# Supplementary material
Source: Springer Nature journal article supplement (https://www.springermedizin.de/resource/supplementary/12889_2013_6095_MOESM1_ESM.pdf/9494396)

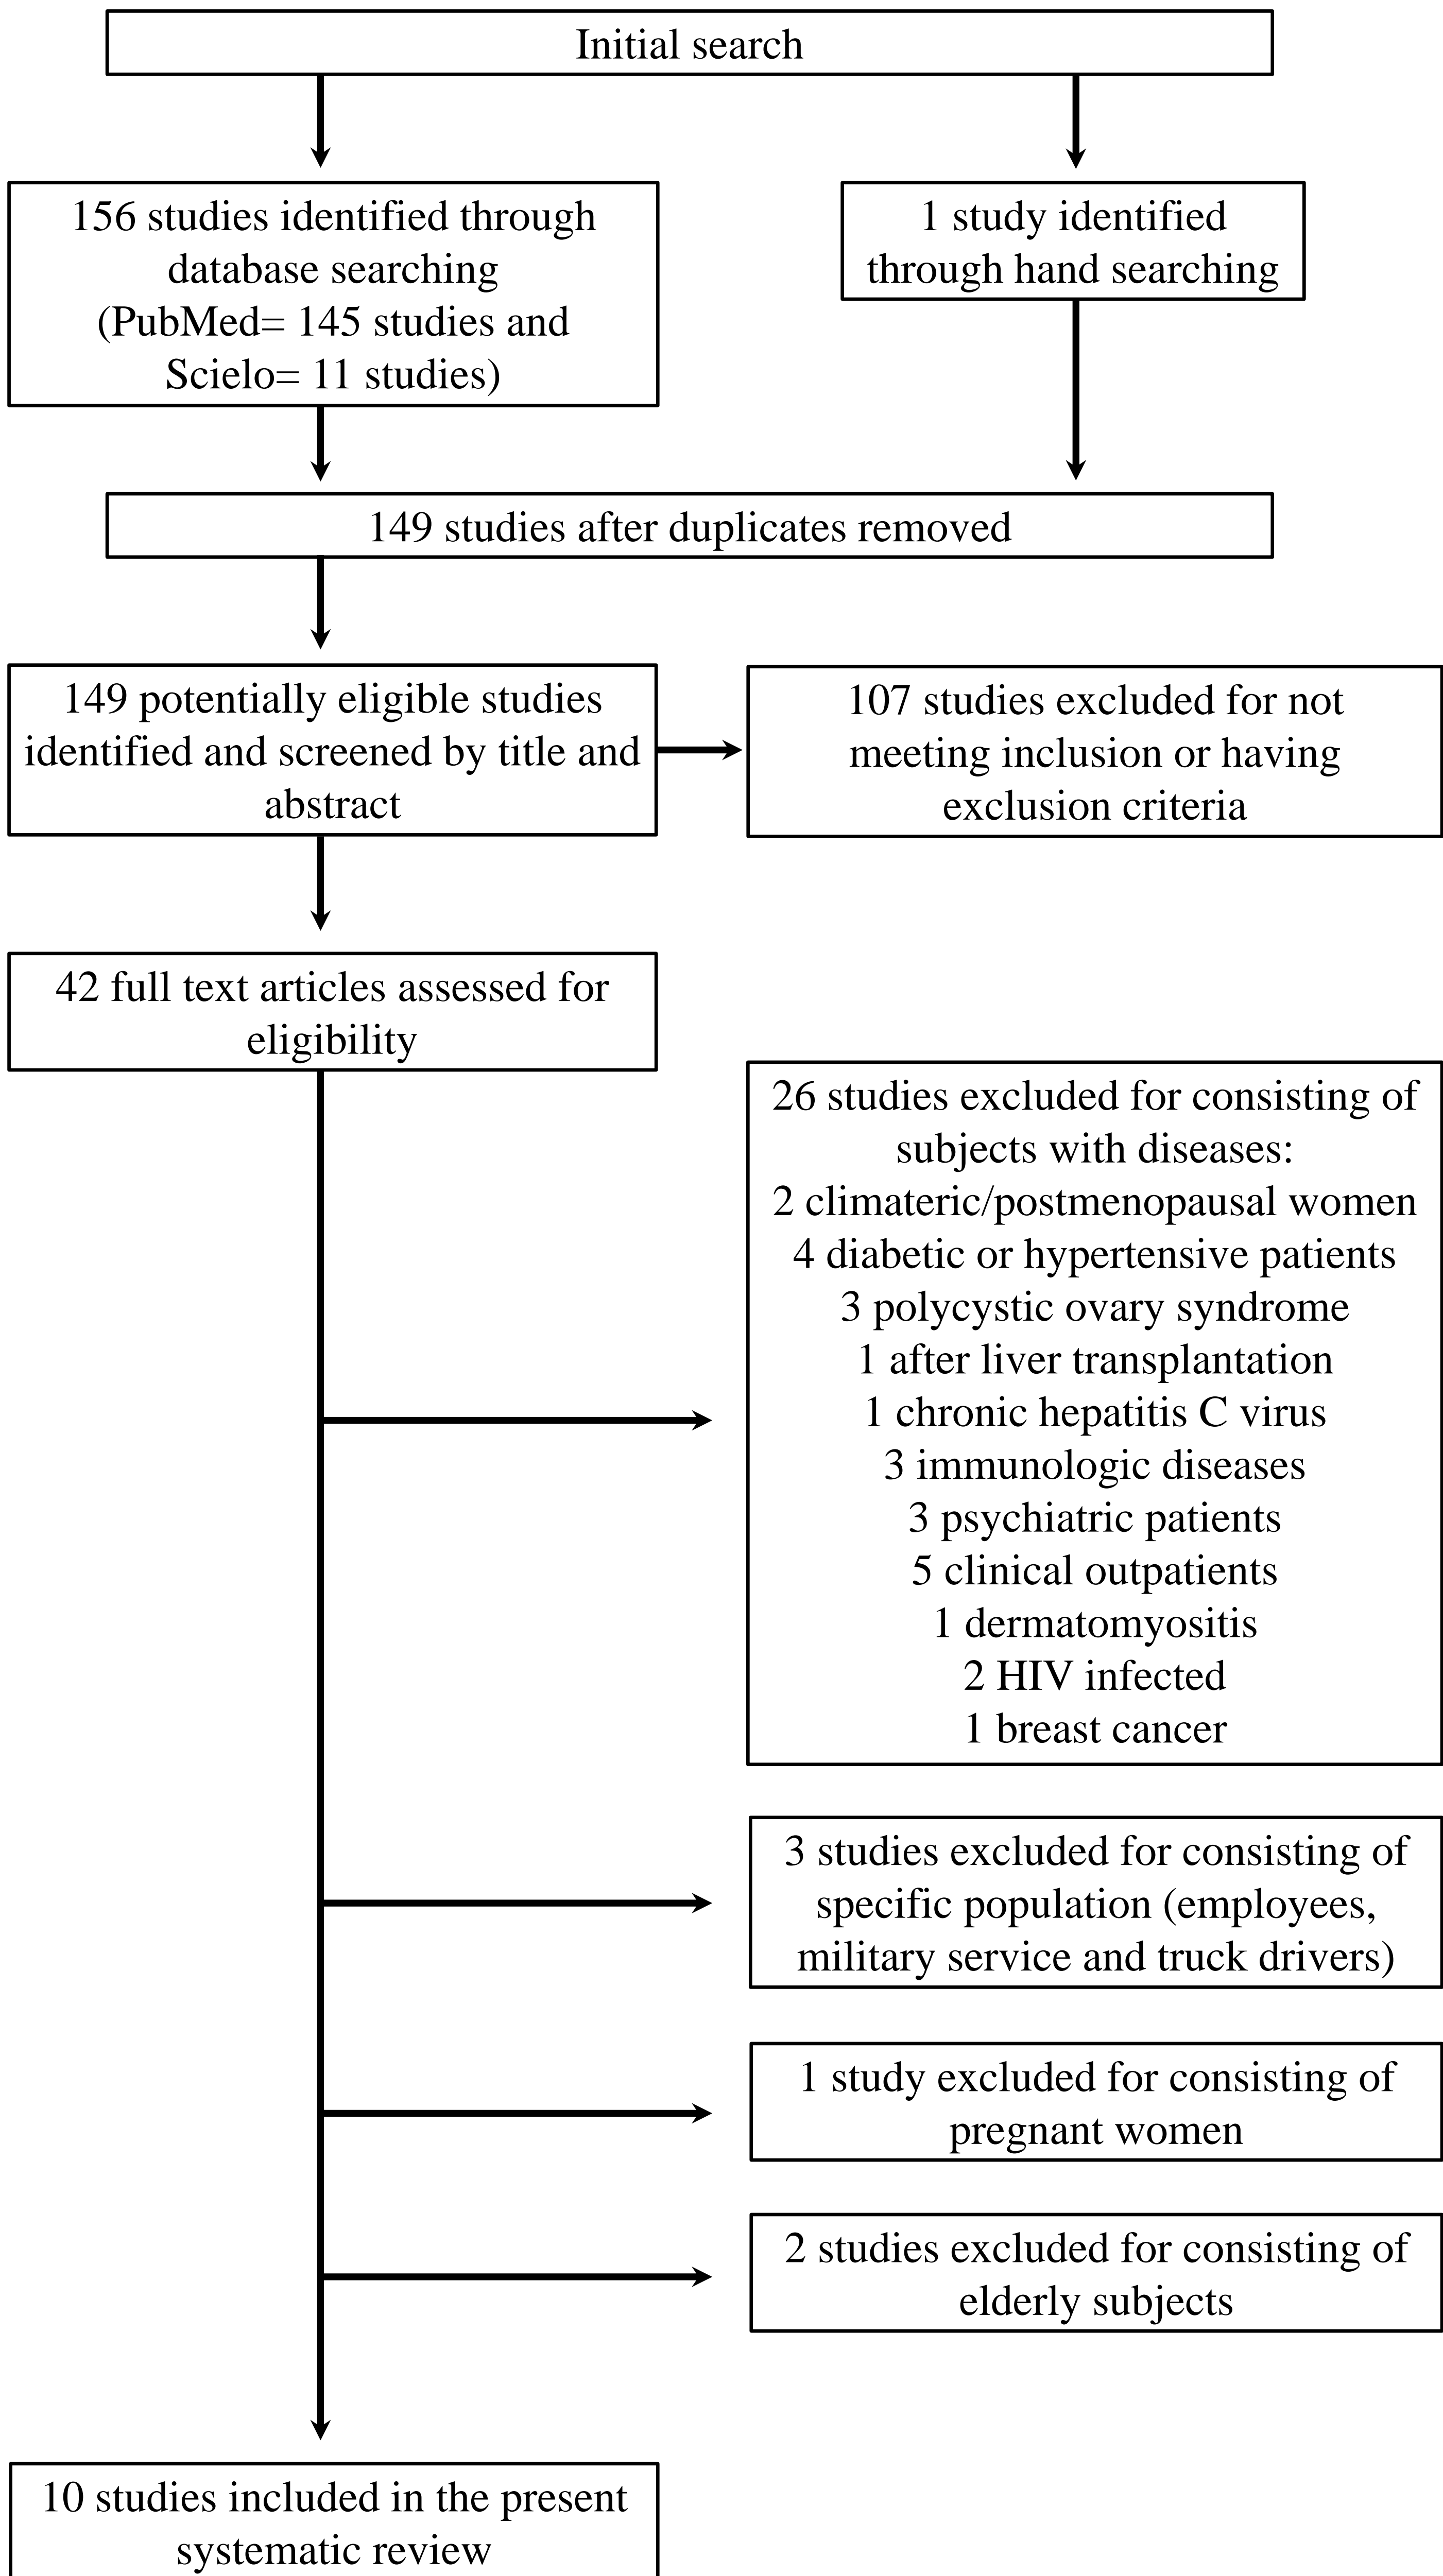

Supplement: MOESM1 [file 9494396]
